# Supplementary material for: Syntheses, structures and magnetic properties of mononuclear, dinuclear and tetranuclear dysprosium(iii) complexes based on azotetrazole-3-hydroxy-2-naphthoic acid
Source: Royal Society of Chemistry journal article supplement (doi:10.1039/d2ce01303g), 2022-01-01
Supplement: d2ce01303g1.pdf [file d2ce01303g1.pdf]

## Electronic Supplementary Information

**Syntheses, structures and magnetic properties of mononuclear, dinuclear and tetranuclear dysprosium(III) complexes based on azotetrazole-3-hydroxy-2-naphthoic acid**

Yun-Jing Zhong<sup>a</sup>, Yu-Ying Zhu<sup>a</sup>, Jin-Lin Mo<sup>a</sup>, Sheng-Lan Ye<sup>a</sup>, Wen-Dan Luo<sup>a</sup>, Xin Huang, Wen-Bin Chen<sup>a\*</sup> and Wen Dong<sup>a\*</sup>

<sup>a</sup>Guangzhou Key Laboratory for Environmentally Functional Materials and Technology, School of Chemistry and Chemical Engineering, Guangzhou University, Guangzhou 510006, P. R. China

## Contents of the Electronic Supplementary Information

|                                                                                                                                                             |    |
|-------------------------------------------------------------------------------------------------------------------------------------------------------------|----|
| <b>Scheme S1.</b> Synthesis of H <sub>3</sub> ATNA. ....                                                                                                    | 3  |
| <b>Table S1-3.</b> Continuous Shape Measures calculations (CShM) for <b>1-3</b> . ....                                                                      | 3  |
| <b>Figure S2.</b> Hydrogen Bonds and $\pi$ - $\pi$ Stacking interaction of H <sub>3</sub> ATNA. ....                                                        | 4  |
| <b>Figure S3.</b> Hydrogen Bonds, $\pi$ - $\pi$ Stacking interaction and 3D Supramolecular structure of <b>1</b> .<br>.....                                 | 5  |
| <b>Figure S4.</b> Hydrogen Bonds and 3D Supramolecular structure of <b>2</b> . ....                                                                         | 6  |
| <b>Figure S5.</b> Hydrogen Bonds and 3D Supramolecular structure of <b>3</b> . ....                                                                         | 7  |
| <b>Table S4.</b> Crystal data and structure refinement of H <sub>3</sub> ATNA and complexes <b>1-3</b> .<br>.....                                           | 8  |
| <b>Figure S6.</b> Powder X-ray diffraction (PXRD) patterns for complexes <b>1-3</b> .<br>.....                                                              | 9  |
| <b>Figure S7.</b> Thermal gravimetric Analyses (TGA) curves for complexes <b>1-3</b> .<br>.....                                                             | 9  |
| <b>Table S5.</b> The bond lengths [ $\text{\AA}$ ] for complex H <sub>3</sub> ATNA. ....                                                                    | 10 |
| <b>Table S6.</b> The angles [ $^{\circ}$ ] for complex H <sub>3</sub> ATNA. ....                                                                            | 10 |
| <b>Table S7.</b> The bond lengths [ $\text{\AA}$ ] for complex <b>1</b> . ....                                                                              | 11 |
| <b>Table S8.</b> The angles [ $^{\circ}$ ] for complex <b>1</b> . ....                                                                                      | 11 |
| <b>Table S9.</b> The bond lengths [ $\text{\AA}$ ] for complex <b>2</b> . ....                                                                              | 12 |
| <b>Table S10.</b> The angles [ $^{\circ}$ ] for complex <b>2</b> . ....                                                                                     | 12 |
| <b>Table S11.</b> The bond lengths [ $\text{\AA}$ ] for complex <b>3</b> . ....                                                                             | 14 |
| <b>Table S12.</b> The angles [ $^{\circ}$ ] for complex <b>3</b> . ....                                                                                     | 14 |
| <b>Figure S8.</b> The isothermal $M$ vs. $H$ plots for <b>1-3</b> . ....                                                                                    | 17 |
| <b>Figure S9.</b> Temperature dependence of the in-phase $\chi_M'$ and out-of-phase $\chi_M''$ for <b>1</b> in a zero dc field and a 1000 Oe dc field. .... | 17 |
| <b>Figure S10.</b> Temperature dependence of the in-phase $\chi_M'$ and out-of-phase $\chi_M''$ for <b>2</b> in a 1000 Oe dc field. ....                    | 17 |
| <b>Figure S11.</b> Temperature dependence of the in-phase $\chi_M'$ and out-of-phase $\chi_M''$ for <b>3</b> in a 1000 Oe dc field. ....                    | 18 |
| <b>Table S13.</b> The average energy barriers( $\Delta E/k_B$ ) and pre-exponential factors( $\tau_0$ ) of complex <b>2</b> . ....                          | 19 |
| <b>Table S14.</b> The average energy barriers( $\Delta E/k_B$ ) and pre-exponential factors( $\tau_0$ ) of complex <b>3</b> .<br>.....                      | 19 |

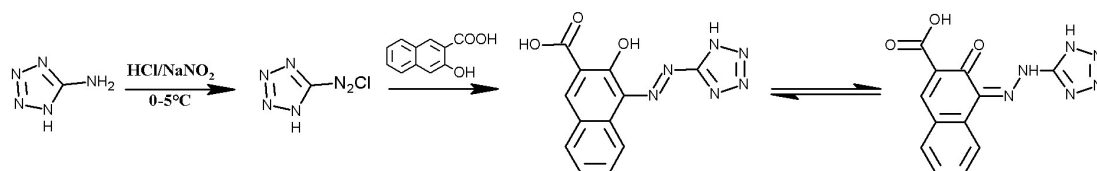

Scheme S1 Synthesis of H<sub>3</sub>ATNA

Table S1 geometry analysis by using SHAPE 2.0 program (complex 1)

|     | JCSAPR-9<br>(C <sub>4v</sub> ) | CSAPR-9<br>(C <sub>4v</sub> ) | JTCTPR-9<br>(D <sub>3h</sub> ) | TCTPR-9<br>(D <sub>3h</sub> ) | MFF-9<br>(C <sub>s</sub> ) |
|-----|--------------------------------|-------------------------------|--------------------------------|-------------------------------|----------------------------|
| Dy1 | 2.01041                        | <b>1.40309</b>                | 1.65661                        | 1.55637                       | 1.96575                    |

Table S2 geometry analysis by using SHAPE 2.0 program (complex 2)

|     | JCSAPR-9<br>(C <sub>4v</sub> ) | CSAPR-9<br>(C <sub>4v</sub> ) | JTCTPR-9<br>(D <sub>3h</sub> ) | TCTPR-9<br>(D <sub>3h</sub> ) | MFF-9<br>(C <sub>s</sub> ) |
|-----|--------------------------------|-------------------------------|--------------------------------|-------------------------------|----------------------------|
| Dy1 | 3.42932                        | 2.72331                       | 3.67878                        | <b>2.51046</b>                | 2.87574                    |

|     | SAPR-8<br>(D <sub>4d</sub> ) | TDD-8<br>(D <sub>2d</sub> ) | JBTPR-8<br>(C <sub>2v</sub> ) | BTPR-8<br>(C <sub>2v</sub> ) | JSD-8<br>(D <sub>2d</sub> ) |
|-----|------------------------------|-----------------------------|-------------------------------|------------------------------|-----------------------------|
| Dy2 | 4.92076                      | 2.58860                     | 3.02256                       | <b>2.23626</b>               | 4.48446                     |

Table S3 geometry analysis by using SHAPE 2.0 program (complex 3)

|     | JCSAPR-9<br>(C <sub>4v</sub> ) | CSAPR-9<br>(C <sub>4v</sub> ) | JTCTPR-9<br>(D <sub>3h</sub> ) | TCTPR-9<br>(D <sub>3h</sub> ) | MFF-9<br>(C <sub>s</sub> ) |
|-----|--------------------------------|-------------------------------|--------------------------------|-------------------------------|----------------------------|
| Dy1 | 3.31516                        | 2.71549                       | 3.42872                        | <b>2.40437</b>                | 2.98622                    |
| Dy4 | 3.18033                        | <b>2.67698</b>                | 3.87098                        | 2.87677                       | 2.89240                    |

|     | SAPR-8<br>(D <sub>4d</sub> ) | TDD-8<br>(D <sub>2d</sub> ) | JBTPR-8<br>(C <sub>2v</sub> ) | BTPR-8<br>(C <sub>2v</sub> ) | JSD-8<br>(D <sub>2d</sub> ) |
|-----|------------------------------|-----------------------------|-------------------------------|------------------------------|-----------------------------|
| Dy2 | 3.24455                      | 2.38178                     | 2.26877                       | <b>1.71392</b>               | 4.53502                     |
| Dy3 | 2.52772                      | 1.96188                     | 2.17738                       | <b>1.55400</b>               | 4.38655                     |

\*CSAPR-9 = Spherical capped square antiprism; TCTPR-9 = Spherical tricapped trigonal prism;

JCSAPR-9 = Capped square antiprism J10; JTCTPR-9 = Tricapped trigonal prism J51;

MFF-9 = Muffin; SAPR-8 = Square antiprism;

TDD-8 = Triangular dodecahedron; JBTPR-8 = Biaugmented trigonal prism J50;

BTPR-8 = Biaugmented trigonal prism; JSD-8 = Snub diphenoid J84.

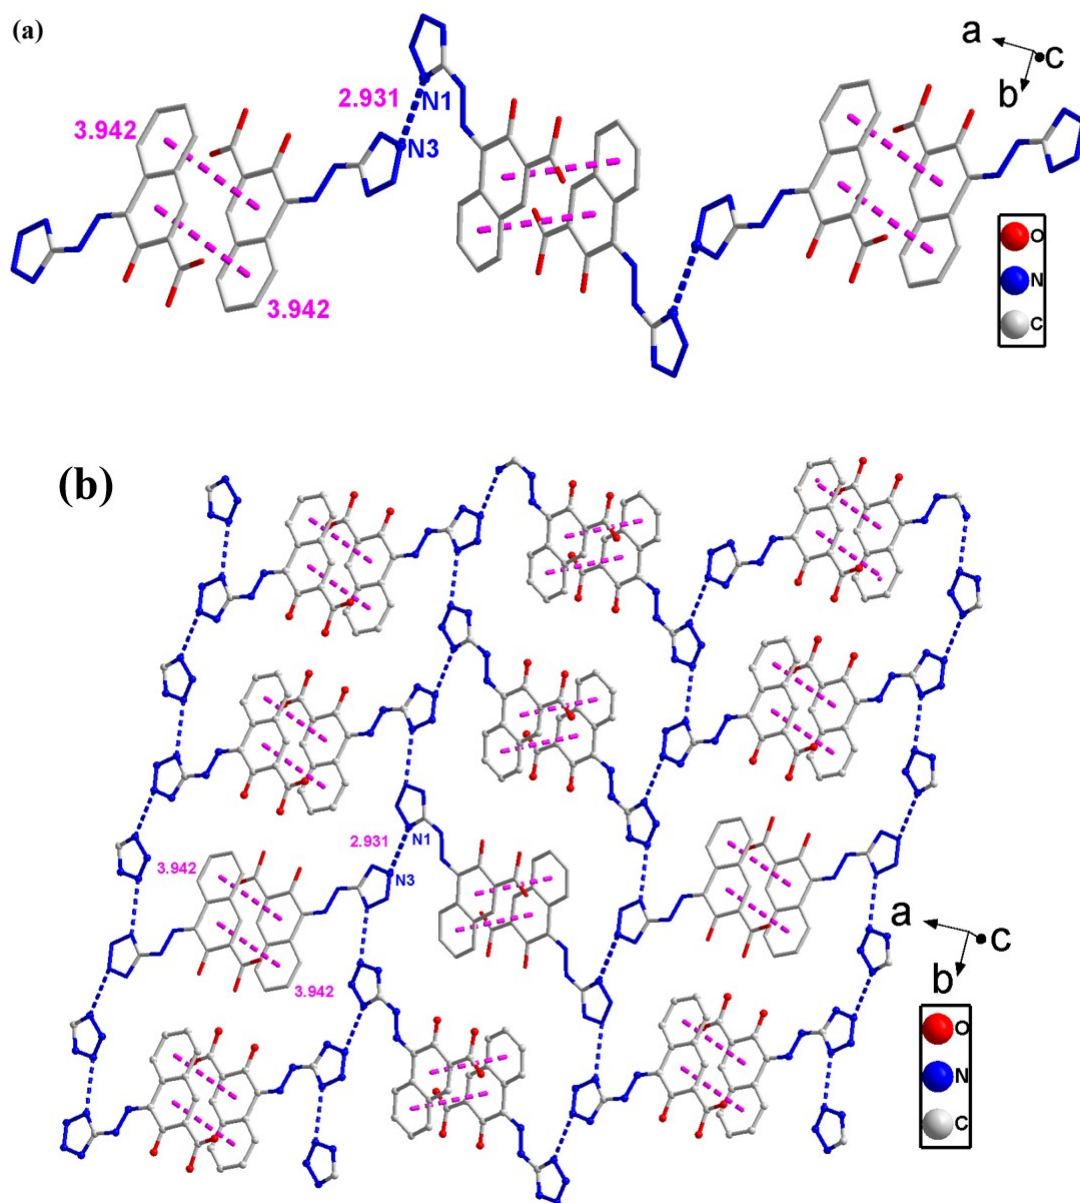

Fig. S1 For H<sub>3</sub>ATNA, (a)hydrogen bonds and  $\pi$ - $\pi$  stacking interaction along the *a* axis, (b) hydrogen bonds and  $\pi$ - $\pi$  stacking interaction along the *a* axis and *b* axis

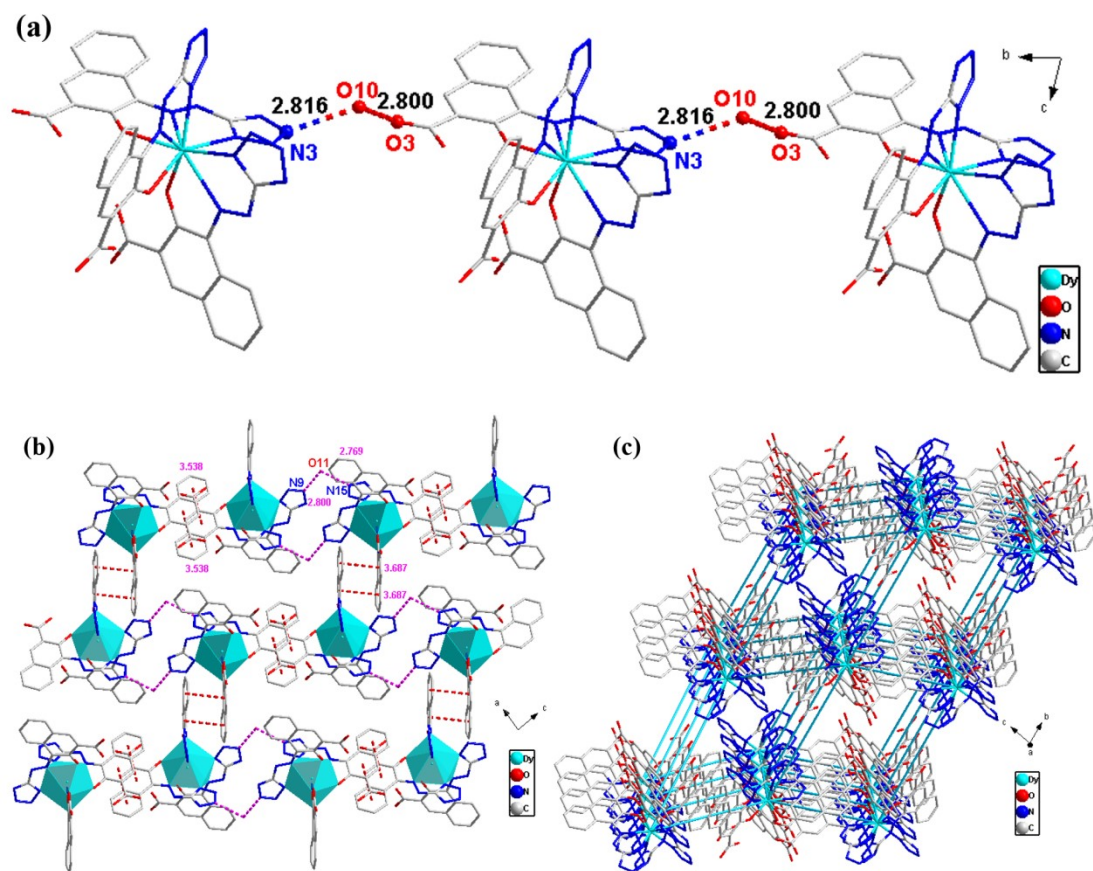

Fig. S2 For **1**, (a)hydrogen bonds along the *b* axis, (b)hydrogen bonds and  $\pi$ - $\pi$  stacking interaction along the *a* axis and *c* axis, (c) 3D supramolecular structure(the blue lines between the dysprosium are just for observation, without any interaction).

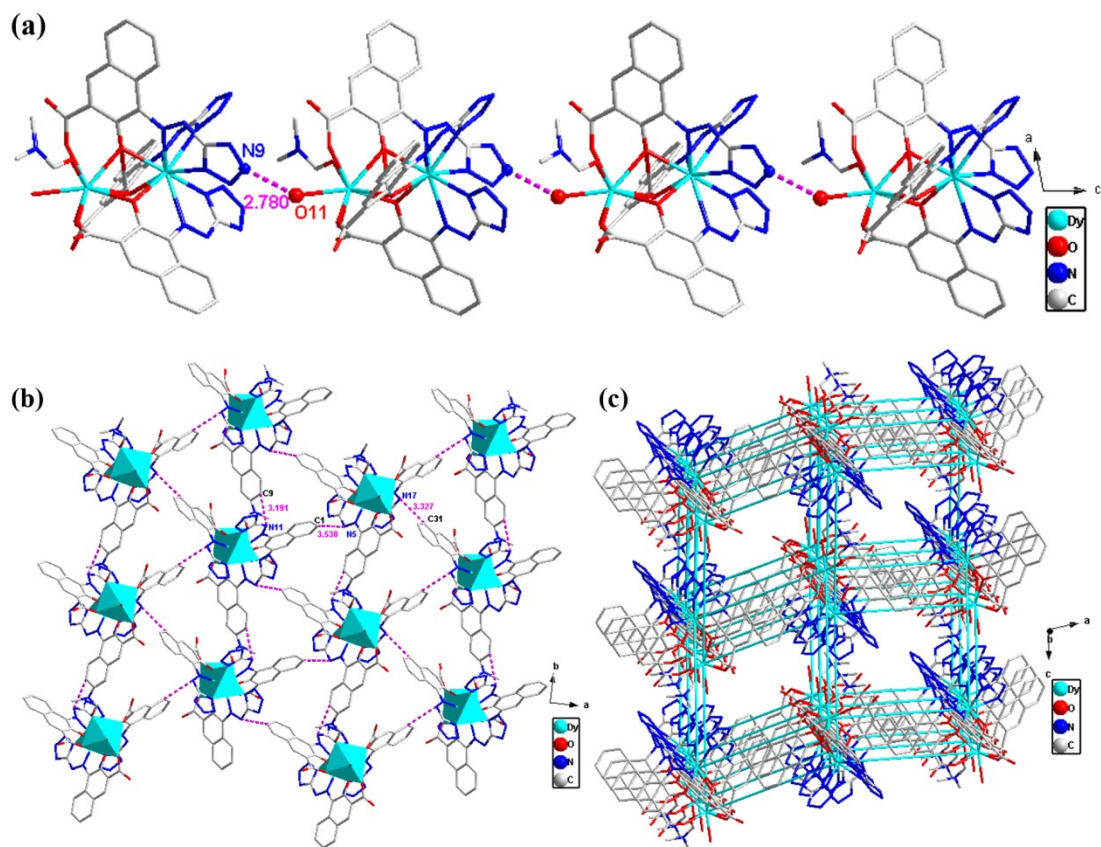

Fig. S3 For **2**, (a) hydrogen bonds along the *c* axis, (b) hydrogen bonds along the *a* and *b* axis to form a two-dimensional plane, (c) 3D supramolecular structure (the blue lines between the dysprosium are just for observation, without any interaction).

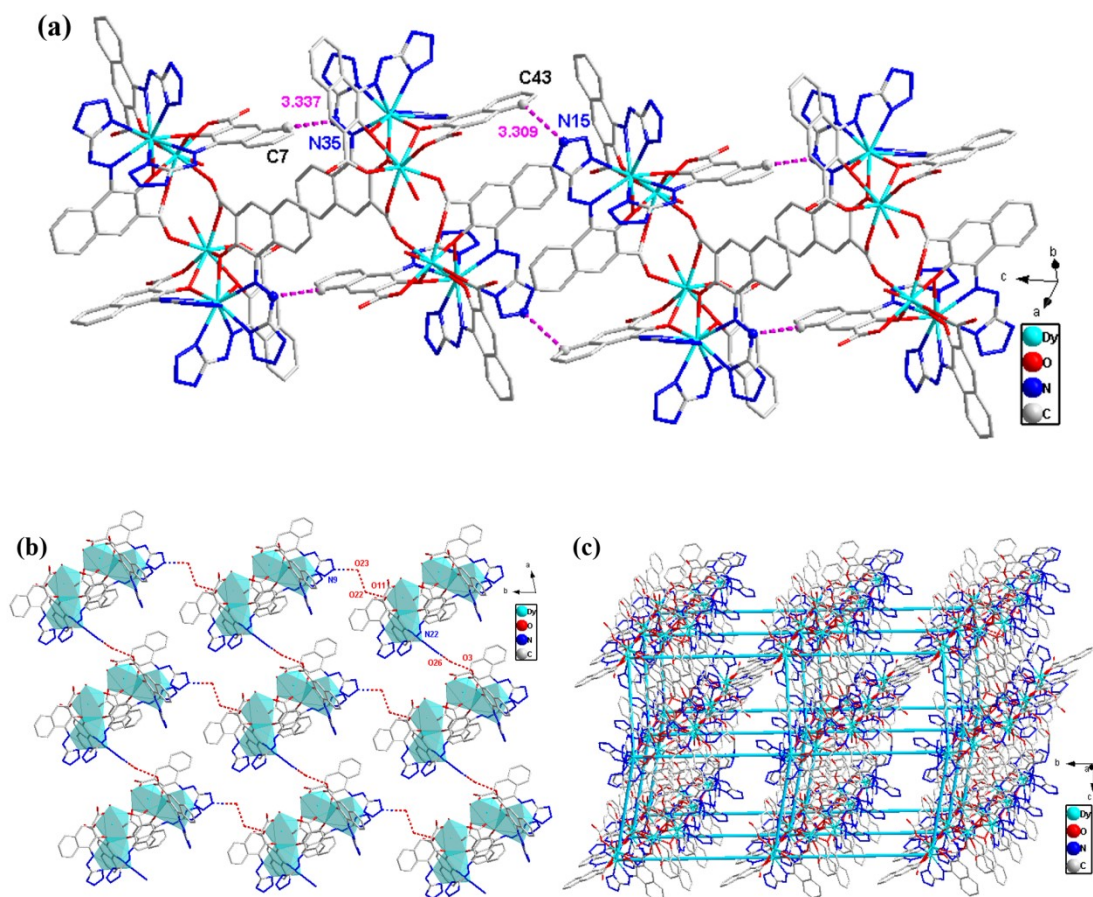

Fig. S4 For **3**, (a) hydrogen bonds along the *c* axis, (b) hydrogen bonds along the *a* and *b* axis to form a two-dimensional plane. (c) 3D supramolecular structure(the blue lines between the dysprosium are just for observation, without any interaction).

Table S4 Crystal data and structure refinement of H<sub>3</sub>ATNA and complexes **1-3**.

| Complexes                                | H <sub>3</sub> ATNA                                          | <b>1</b>                                                          | <b>2</b>                                                                        | <b>3</b>                                                                          |
|------------------------------------------|--------------------------------------------------------------|-------------------------------------------------------------------|---------------------------------------------------------------------------------|-----------------------------------------------------------------------------------|
| Empirical formula                        | C <sub>12</sub> H <sub>8</sub> N <sub>6</sub> O <sub>3</sub> | C <sub>54</sub> H <sub>76</sub> DyN <sub>21</sub> O <sub>14</sub> | C <sub>46</sub> H <sub>47</sub> Dy <sub>2</sub> N <sub>21</sub> O <sub>16</sub> | C <sub>115</sub> H <sub>165</sub> Dy <sub>4</sub> N <sub>45</sub> O <sub>29</sub> |
| Formula weight                           | 284.24                                                       | 1405.85                                                           | 1475.04                                                                         | 3291.91                                                                           |
| Crystal system                           | monoclinic                                                   | triclinic                                                         | monoclinic                                                                      | triclinic                                                                         |
| Space group                              | <i>P2<sub>1</sub>/c</i>                                      | <i>P</i> $\bar{1}$                                                | <i>P2<sub>1</sub>/c</i>                                                         | <i>P</i> $\bar{1}$                                                                |
| <i>a</i> /Å                              | 9.4569(11)                                                   | 13.5498(2)                                                        | 22.56781(18)                                                                    | 14.5277(2)                                                                        |
| <i>b</i> /Å                              | 9.3238(11)                                                   | 14.6671(2)                                                        | 12.14163(10)                                                                    | 19.5900(3)                                                                        |
| <i>c</i> /Å                              | 13.6224(16)                                                  | 17.4729(3)                                                        | 23.5494(2)                                                                      | 24.9631(4)                                                                        |
| $\alpha$ /°                              | 90                                                           | 75.5730(10)                                                       | 90                                                                              | 85.4820(10)                                                                       |
| $\beta$ /°                               | 106.127(8)                                                   | 81.5450(10)                                                       | 101.8928(9)                                                                     | 76.1500(10)                                                                       |
| $\gamma$ /°                              | 90                                                           | 73.268(2)                                                         | 90                                                                              | 75.6980(10)                                                                       |
| Volume/Å <sup>3</sup>                    | 1153.9(2)                                                    | 3209.98(9)                                                        | 6314.26(10)                                                                     | 6682.64(18)                                                                       |
| <i>Z</i>                                 | 4                                                            | 2                                                                 | 4                                                                               | 2                                                                                 |
| $\rho_{\text{calc}}$ /g·cm <sup>-3</sup> | 1.636                                                        | 1.455                                                             | 1.552                                                                           | 1.636                                                                             |
| $\mu$ /mm <sup>-1</sup>                  | 0.124                                                        | 6.884                                                             | 13.181                                                                          | 12.505                                                                            |
| F (000)                                  | 584.0                                                        | 1450.0                                                            | 2920.0                                                                          | 3332.0                                                                            |
| Reflections collected                    | 18248                                                        | 44179                                                             | 49042                                                                           | 94700                                                                             |
| Independent reflections                  | 2651                                                         | 12616                                                             | 12343                                                                           | 26062                                                                             |
| Goodness-of-fit on F <sup>2</sup>        | 1.021                                                        | 1.067                                                             | 1.046                                                                           | 1.042                                                                             |
| Final R indexes [I ≥ 2σ(I)]              | R <sub>1</sub> = 0.0394<br>wR <sub>2</sub> = 0.0791          | R <sub>1</sub> = 0.0476<br>wR <sub>2</sub> = 0.1184               | R <sub>1</sub> = 0.0502<br>wR <sub>2</sub> = 0.1259                             | R <sub>1</sub> = 0.0707<br>wR <sub>2</sub> = 0.1549                               |
| Final R indexes [all data]               | R <sub>1</sub> = 0.0814<br>wR <sub>2</sub> = 0.0954          | R <sub>1</sub> = 0.0514<br>wR <sub>2</sub> = 0.1201               | R <sub>1</sub> = 0.0552<br>wR <sub>2</sub> = 0.1286                             | R <sub>1</sub> = 0.0877<br>wR <sub>2</sub> = 0.1635                               |
| CCDC                                     | 2207284                                                      | 2207285                                                           | 2207286                                                                         | 2207287                                                                           |



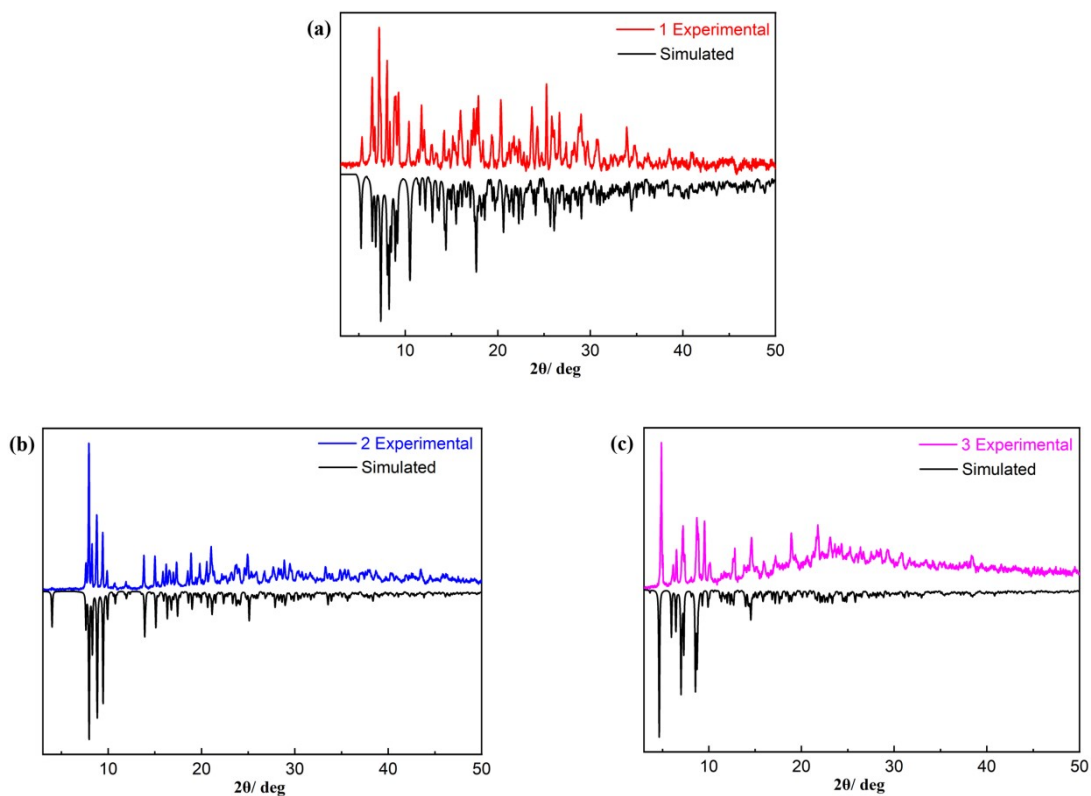

Fig. S5 Powder X-ray diffraction (PXRD) patterns for complexes **1-3**

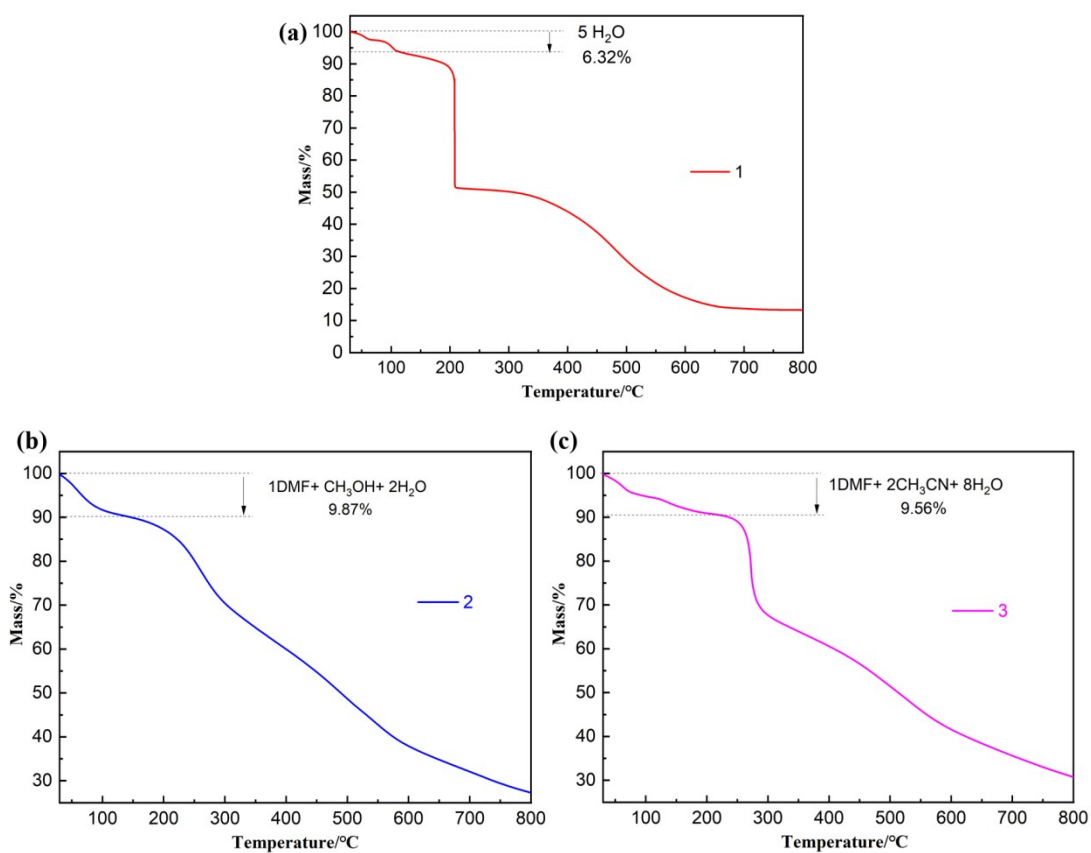

Fig. S6 TG curves of complexes **1-3**.

Table S5 The bond lengths[Å] for H<sub>3</sub>ATAN

| Atom | Atom | Length/Å   | Atom | Atom | Length/Å |
|------|------|------------|------|------|----------|
| O1   | C12  | 1.201(2)   | C2   | C10  | 1.462(2) |
| O2   | C12  | 1.325(2)   | C3   | C4   | 1.448(2) |
| O3   | C3   | 1.2463(19) | C4   | C5   | 1.351(2) |
| N1   | N2   | 1.3521(18) | C4   | C12  | 1.490(2) |
| N1   | C1   | 1.330(2)   | C5   | C11  | 1.435(2) |
| N2   | N3   | 1.2885(19) | C6   | C7   | 1.368(3) |
| N3   | N4   | 1.3617(19) | C6   | C11  | 1.398(2) |
| N4   | C1   | 1.3137(19) | C7   | C8   | 1.380(3) |
| N5   | N6   | 1.3277(18) | C8   | C9   | 1.374(2) |
| N5   | C1   | 1.365(2)   | C9   | C10  | 1.391(2) |
| N6   | C2   | 1.3111(19) | C10  | C11  | 1.404(2) |
| C2   | C3   | 1.468(2)   |      |      |          |

Table S6 The bond angles [°] for complex H<sub>3</sub>ATAN

| Atom | Atom | Atom | Angle/°    | Atom | Atom | Atom | Angle/°    |
|------|------|------|------------|------|------|------|------------|
| C1   | N1   | N2   | 108.02(14) | C5   | C4   | C3   | 120.04(15) |
| N3   | N2   | N1   | 105.87(13) | C5   | C4   | C12  | 118.25(16) |
| N2   | N3   | N4   | 111.75(13) | C4   | C5   | C11  | 123.77(16) |
| C1   | N4   | N3   | 104.53(13) | C7   | C6   | C11  | 120.28(17) |
| N6   | N5   | C1   | 116.44(14) | C6   | C7   | C8   | 119.93(19) |
| C2   | N6   | N5   | 120.50(14) | C9   | C8   | C7   | 120.78(19) |
| N1   | C1   | N5   | 125.20(15) | C8   | C9   | C10  | 120.54(17) |
| N4   | C1   | N1   | 109.83(14) | C9   | C10  | C2   | 122.55(15) |
| N4   | C1   | N5   | 124.90(15) | C9   | C10  | C11  | 118.56(15) |
| N6   | C2   | C3   | 124.32(15) | C11  | C10  | C2   | 118.88(14) |
| N6   | C2   | C10  | 115.70(14) | C6   | C11  | C5   | 120.80(15) |
| C10  | C2   | C3   | 119.96(14) | C6   | C11  | C10  | 119.90(16) |
| O3   | C3   | C2   | 120.45(15) | C10  | C11  | C5   | 119.30(15) |
| O3   | C3   | C4   | 121.84(15) | O1   | C12  | O2   | 120.16(19) |
| C4   | C3   | C2   | 117.71(15) | O1   | C12  | C4   | 122.50(19) |
| C3   | C4   | C12  | 121.71(16) | O2   | C12  | C4   | 117.32(17) |

Table S7 The bond lengths[Å] for complex 1

| Atom | Atom | Length/Å | Atom | Atom | Length/Å |
|------|------|----------|------|------|----------|
| Dy1  | O1   | 2.331(3) | Dy1  | N7   | 2.438(3) |
| Dy1  | O4   | 2.306(3) | Dy1  | N12  | 2.622(3) |
| Dy1  | O7   | 2.310(3) | Dy1  | N13  | 2.454(3) |
| Dy1  | N1   | 2.455(3) | Dy1  | N18  | 2.604(3) |
| Dy1  | N6   | 2.582(3) |      |      |          |

Table S8 The bond angles [°] for complex 1

| Atom | Atom | Atom | Angle/°    | Atom | Atom | Atom | Angle/°    |
|------|------|------|------------|------|------|------|------------|
| O1   | Dy1  | N1   | 126.82(10) | O4   | Dy1  | N18  | 73.47(10)  |
| O1   | Dy1  | N6   | 63.93(9)   | O7   | Dy1  | O1   | 81.06(10)  |
| O1   | Dy1  | N7   | 83.44(10)  | O7   | Dy1  | N1   | 85.58(11)  |
| O1   | Dy1  | N12  | 76.17(10)  | O7   | Dy1  | N6   | 74.63(10)  |
| O1   | Dy1  | N13  | 147.81(11) | O7   | Dy1  | N7   | 149.50(10) |
| O1   | Dy1  | N18  | 138.36(10) | O7   | Dy1  | N12  | 137.10(10) |
| O4   | Dy1  | O1   | 77.17(10)  | O7   | Dy1  | N13  | 126.09(10) |
| O4   | Dy1  | O7   | 76.32(10)  | O7   | Dy1  | N18  | 63.84(10)  |
| O4   | Dy1  | N1   | 147.47(11) | N1   | Dy1  | N6   | 62.89(10)  |
| O4   | Dy1  | N6   | 134.16(10) | N1   | Dy1  | N12  | 136.93(11) |
| O4   | Dy1  | N7   | 125.25(11) | N1   | Dy1  | N18  | 74.32(11)  |
| O4   | Dy1  | N12  | 63.50(10)  | N6   | Dy1  | N12  | 123.90(10) |
| O4   | Dy1  | N13  | 91.82(11)  | N6   | Dy1  | N18  | 121.60(10) |
| N7   | Dy1  | N1   | 82.94(12)  | N13  | Dy1  | N1   | 77.19(11)  |
| N7   | Dy1  | N6   | 74.98(11)  | N13  | Dy1  | N6   | 134.00(11) |
| N7   | Dy1  | N12  | 62.27(11)  | N13  | Dy1  | N12  | 71.88(11)  |
| N7   | Dy1  | N13  | 78.48(11)  | N13  | Dy1  | N18  | 62.37(11)  |
| N7   | Dy1  | N18  | 137.94(11) | N18  | Dy1  | N12  | 114.48(10) |

Table S9 The bond lengths[Å] for complex 2

| Atom | Atom | Length/Å | Atom | Atom | Length/Å  |
|------|------|----------|------|------|-----------|
| Dy1  | O4   | 2.304(3) | Dy1  | Dy2  | 3.6391(4) |
| Dy1  | O7   | 2.385(3) | Dy2  | O4   | 2.352(3)  |
| Dy1  | O1   | 2.339(3) | Dy2  | O7   | 2.416(3)  |
| Dy1  | N7   | 2.487(4) | Dy2  | O1   | 2.469(3)  |
| Dy1  | N12  | 2.611(4) | Dy2  | O5   | 2.349(4)  |
| Dy1  | N6   | 2.585(4) | Dy2  | O2   | 2.291(4)  |
| Dy1  | N13  | 2.463(4) | Dy2  | O10  | 2.350(4)  |
| Dy1  | N18  | 2.567(4) | Dy2  | O8   | 2.306(4)  |
| Dy1  | N1   | 2.476(4) | Dy2  | O11  | 2.431(4)  |

Table S10 The bond angles [°] for complex 2

| Atom | Atom | Atom | Angle/°    | Atom | Atom | Atom | Angle/°    |
|------|------|------|------------|------|------|------|------------|
| O4   | Dy1  | Dy2  | 39.06(8)   | O4   | Dy2  | Dy1  | 38.13(7)   |
| O4   | Dy1  | O7   | 69.77(11)  | O4   | Dy2  | O7   | 68.47(11)  |
| O4   | Dy1  | O1   | 68.10(11)  | O4   | Dy2  | O1   | 65.24(11)  |
| O4   | Dy1  | N7   | 121.54(13) | O4   | Dy2  | O11  | 137.56(12) |
| O4   | Dy1  | N12  | 62.35(12)  | O7   | Dy2  | Dy1  | 40.39(7)   |
| O4   | Dy1  | N6   | 82.47(12)  | O7   | Dy2  | O1   | 65.95(11)  |
| O4   | Dy1  | N13  | 151.31(13) | O7   | Dy2  | O11  | 147.82(14) |
| O4   | Dy1  | N18  | 132.56(12) | O1   | Dy2  | Dy1  | 39.50(8)   |
| O4   | Dy1  | N1   | 98.46(13)  | O5   | Dy2  | Dy1  | 101.26(9)  |
| O7   | Dy1  | Dy2  | 41.03(8)   | O5   | Dy2  | O4   | 68.43(12)  |
| O7   | Dy1  | N7   | 93.78(13)  | O5   | Dy2  | O7   | 136.85(12) |
| O7   | Dy1  | N12  | 89.77(12)  | O5   | Dy2  | O1   | 97.42(12)  |
| O7   | Dy1  | N6   | 131.39(13) | O5   | Dy2  | O10  | 77.60(13)  |
| O7   | Dy1  | N13  | 122.75(12) | O5   | Dy2  | O11  | 71.77(14)  |
| O7   | Dy1  | N18  | 63.45(12)  | O2   | Dy2  | Dy1  | 107.23(10) |
| O7   | Dy1  | N1   | 157.40(13) | O2   | Dy2  | O4   | 129.28(13) |
| O1   | Dy1  | Dy2  | 42.15(8)   | O2   | Dy2  | O7   | 110.66(13) |
| O1   | Dy1  | O7   | 68.50(12)  | O2   | Dy2  | O1   | 68.86(12)  |
| O1   | Dy1  | N7   | 156.49(13) | O2   | Dy2  | O5   | 97.96(14)  |
| O1   | Dy1  | N12  | 130.22(11) | O2   | Dy2  | O10  | 148.16(14) |
| O1   | Dy1  | N6   | 64.28(13)  | O2   | Dy2  | O8   | 88.56(15)  |
| O1   | Dy1  | N13  | 91.56(12)  | O2   | Dy2  | O11  | 70.03(14)  |
| O1   | Dy1  | N18  | 87.48(12)  | O10  | Dy2  | Dy1  | 104.54(10) |
| O1   | Dy1  | N1   | 126.27(14) | O10  | Dy2  | O4   | 78.93(12)  |
| N7   | Dy1  | Dy2  | 130.22(10) | O10  | Dy2  | O7   | 92.33(13)  |

---

|     |     |     |            |     |     |     |            |
|-----|-----|-----|------------|-----|-----|-----|------------|
| N7  | Dy1 | N12 | 61.93(13)  | O10 | Dy2 | O1  | 142.74(12) |
| N7  | Dy1 | N6  | 134.80(14) | O10 | Dy2 | O11 | 78.77(15)  |
| N7  | Dy1 | N18 | 70.35(14)  | O8  | Dy2 | Dy1 | 112.33(10) |
| N12 | Dy1 | Dy2 | 92.21(8)   | O8  | Dy2 | O4  | 132.70(13) |
| N6  | Dy1 | Dy2 | 93.24(10)  | O8  | Dy2 | O7  | 72.15(12)  |
| N6  | Dy1 | N12 | 112.01(13) | O8  | Dy2 | O1  | 119.48(12) |
| N13 | Dy1 | Dy2 | 131.74(10) | O8  | Dy2 | O5  | 142.16(13) |
| N13 | Dy1 | N7  | 85.19(14)  | O8  | Dy2 | O10 | 77.54(15)  |
| N13 | Dy1 | N12 | 136.03(13) | O8  | Dy2 | O11 | 75.73(15)  |
| N13 | Dy1 | N6  | 70.20(13)  | O11 | Dy2 | Dy1 | 171.67(12) |
| N13 | Dy1 | N18 | 62.54(13)  | O11 | Dy2 | O1  | 135.34(14) |
| N13 | Dy1 | N1  | 76.89(13)  | N1  | Dy1 | N7  | 75.65(15)  |
| N18 | Dy1 | Dy2 | 95.98(9)   | N1  | Dy1 | N12 | 67.64(13)  |
| N18 | Dy1 | N12 | 123.00(13) | N1  | Dy1 | N6  | 62.42(15)  |
| N18 | Dy1 | N6  | 123.62(13) | N1  | Dy1 | N18 | 128.15(13) |
| N1  | Dy1 | Dy2 | 135.80(10) |     |     |     |            |

---

Table S11 The bond lengths[Å] for complex **3**

| Atom | Atom | Length/Å  | Atom | Atom | Length/Å  |
|------|------|-----------|------|------|-----------|
| Dy1  | Dy2  | 3.6124(6) | Dy3  | Dy4  | 3.6191(6) |
| Dy1  | O1   | 2.290(5)  | Dy3  | O9   | 2.352(5)  |
| Dy1  | O4   | 2.352(5)  | Dy3  | O10  | 2.331(5)  |
| Dy1  | O7   | 2.392(5)  | Dy3  | O11  | 2.319(5)  |
| Dy1  | N1   | 2.499(6)  | Dy3  | O13  | 2.418(5)  |
| Dy1  | N6   | 2.610(6)  | Dy3  | O14  | 2.275(5)  |
| Dy1  | N7   | 2.460(6)  | Dy3  | O16  | 2.443(5)  |
| Dy1  | N12  | 2.621(6)  | Dy3  | O17  | 2.313(5)  |
| Dy1  | N13  | 2.438(6)  | Dy3  | O20  | 2.441(5)  |
| Dy1  | N18  | 2.563(6)  | Dy4  | O10  | 2.262(5)  |
| Dy2  | O1   | 2.353(6)  | Dy4  | O13  | 2.395(5)  |
| Dy2  | O2   | 2.310(5)  | Dy4  | O16  | 2.388(5)  |
| Dy2  | O4   | 2.398(4)  | Dy4  | N19  | 2.480(6)  |
| Dy2  | O5   | 2.251(5)  | Dy4  | N24  | 2.622(6)  |
| Dy2  | O7   | 2.449(5)  | Dy4  | N25  | 2.471(6)  |
| Dy2  | O8   | 2.285(5)  | Dy4  | N31  | 2.453(6)  |
| Dy2  | O18  | 2.380(5)  | Dy4  | N36  | 2.554(6)  |
| Dy2  | O19  | 2.464(5)  | Dy4  | N30  | 2.602(7)  |

Table S12 The bond angles [°] for complex **3**

| Atom | Atom | Atom | Angle/°    | Atom | Atom | Atom | Angle/°    |
|------|------|------|------------|------|------|------|------------|
| O1   | Dy1  | Dy2  | 39.56(11)  | O1   | Dy2  | Dy1  | 38.29(11)  |
| O1   | Dy1  | O4   | 68.67(16)  | O1   | Dy2  | O4   | 66.88(16)  |
| O1   | Dy1  | O7   | 72.28(16)  | O1   | Dy2  | O7   | 70.20(16)  |
| O1   | Dy1  | N1   | 122.65(18) | O1   | Dy2  | O18  | 74.85(16)  |
| O1   | Dy1  | N6   | 62.46(17)  | O1   | Dy2  | O19  | 131.09(17) |
| O1   | Dy1  | N7   | 88.73(19)  | O2   | Dy2  | Dy1  | 102.58(12) |
| O1   | Dy1  | N12  | 83.01(17)  | O2   | Dy2  | O1   | 68.74(17)  |
| O1   | Dy1  | N13  | 153.44(19) | O2   | Dy2  | O4   | 101.79(17) |
| O1   | Dy1  | N18  | 135.31(17) | O2   | Dy2  | O7   | 138.78(16) |
| O4   | Dy1  | Dy2  | 40.97(11)  | O2   | Dy2  | O18  | 84.73(17)  |
| O4   | Dy1  | O7   | 66.07(15)  | O2   | Dy2  | O19  | 69.75(17)  |
| O4   | Dy1  | N1   | 154.56(17) | O4   | Dy2  | Dy1  | 40.02(11)  |
| O4   | Dy1  | N6   | 129.92(17) | O4   | Dy2  | O7   | 64.50(15)  |
| O4   | Dy1  | N7   | 121.55(18) | O4   | Dy2  | O19  | 147.46(17) |
| O4   | Dy1  | N12  | 62.38(17)  | O5   | Dy2  | Dy1  | 112.52(14) |
| O4   | Dy1  | N13  | 99.27(18)  | O5   | Dy2  | O1   | 131.20(18) |
| O4   | Dy1  | N18  | 84.84(17)  | O5   | Dy2  | O2   | 94.75(19)  |

---

|     |     |     |            |     |     |     |            |
|-----|-----|-----|------------|-----|-----|-----|------------|
| O7  | Dy1 | Dy2 | 42.33(11)  | O5  | Dy2 | O4  | 72.78(18)  |
| O7  | Dy1 | N1  | 94.38(18)  | O5  | Dy2 | O7  | 115.18(18) |
| O7  | Dy1 | N6  | 88.73(16)  | O5  | Dy2 | O8  | 84.51(18)  |
| O7  | Dy1 | N7  | 155.72(19) | O5  | Dy2 | O18 | 151.74(18) |
| O7  | Dy1 | N12 | 127.97(17) | O5  | Dy2 | O19 | 76.63(19)  |
| O7  | Dy1 | N13 | 125.83(19) | O7  | Dy2 | Dy1 | 41.14(11)  |
| O7  | Dy1 | N18 | 64.08(17)  | O7  | Dy2 | O19 | 141.78(16) |
| N1  | Dy1 | Dy2 | 131.53(14) | O8  | Dy2 | Dy1 | 114.20(12) |
| N1  | Dy1 | N6  | 61.71(19)  | O8  | Dy2 | O1  | 137.37(17) |
| N1  | Dy1 | N12 | 136.89(19) | O8  | Dy2 | O2  | 140.49(17) |
| N1  | Dy1 | N18 | 71.52(18)  | O8  | Dy2 | O4  | 115.43(17) |
| N6  | Dy1 | Dy2 | 91.15(13)  | O8  | Dy2 | O7  | 73.49(16)  |
| N6  | Dy1 | N12 | 119.30(18) | O8  | Dy2 | O18 | 78.35(17)  |
| N7  | Dy1 | Dy2 | 125.96(15) | O8  | Dy2 | O19 | 71.70(17)  |
| N7  | Dy1 | N1  | 83.0(2)    | O18 | Dy2 | Dy1 | 95.06(12)  |
| N7  | Dy1 | N6  | 68.72(19)  | O18 | Dy2 | O4  | 135.07(16) |
| N7  | Dy1 | N12 | 61.81(19)  | O18 | Dy2 | O7  | 81.32(16)  |
| N7  | Dy1 | N18 | 135.9(2)   | O18 | Dy2 | O19 | 76.72(17)  |
| N12 | Dy1 | Dy2 | 90.85(13)  | O19 | Dy2 | Dy1 | 169.01(13) |
| N13 | Dy1 | Dy2 | 139.17(14) | O10 | Dy4 | Dy3 | 38.67(12)  |
| N13 | Dy1 | N1  | 78.5(2)    | O10 | Dy4 | O13 | 67.87(17)  |
| N13 | Dy1 | N6  | 129.68(19) | O10 | Dy4 | O16 | 72.41(16)  |
| N13 | Dy1 | N7  | 77.5(2)    | O10 | Dy4 | N19 | 121.48(19) |
| N13 | Dy1 | N12 | 70.5(2)    | O10 | Dy4 | N24 | 62.59(17)  |
| N13 | Dy1 | N18 | 62.79(19)  | O10 | Dy4 | N25 | 86.25(19)  |
| N18 | Dy1 | Dy2 | 97.46(12)  | O10 | Dy4 | N31 | 154.90(19) |
| N18 | Dy1 | N6  | 123.37(18) | O10 | Dy4 | N36 | 135.14(18) |
| N18 | Dy1 | N12 | 116.42(18) | O10 | Dy4 | N30 | 85.24(19)  |
| O9  | Dy3 | Dy4 | 92.26(12)  | O13 | Dy4 | Dy3 | 41.48(11)  |
| O9  | Dy3 | O13 | 133.26(16) | O13 | Dy4 | N19 | 153.30(18) |
| O9  | Dy3 | O16 | 79.81(16)  | O13 | Dy4 | N24 | 129.16(17) |
| O9  | Dy3 | O20 | 78.03(17)  | O13 | Dy4 | N25 | 119.09(19) |
| O10 | Dy3 | Dy4 | 37.35(11)  | O13 | Dy4 | N31 | 103.25(19) |
| O10 | Dy3 | O9  | 74.17(16)  | O13 | Dy4 | N36 | 84.37(18)  |
| O10 | Dy3 | O13 | 66.43(16)  | O13 | Dy4 | N30 | 62.24(18)  |
| O10 | Dy3 | O16 | 70.27(16)  | O16 | Dy4 | Dy3 | 42.08(12)  |
| O10 | Dy3 | O20 | 130.52(17) | O16 | Dy4 | O13 | 65.40(16)  |
| O11 | Dy3 | Dy4 | 100.50(12) | O16 | Dy4 | N19 | 92.48(19)  |
| O11 | Dy3 | O9  | 90.07(17)  | O16 | Dy4 | N24 | 88.97(16)  |
| O11 | Dy3 | O10 | 68.38(17)  | O16 | Dy4 | N25 | 154.83(19) |

---

---

|     |     |     |            |     |     |     |            |
|-----|-----|-----|------------|-----|-----|-----|------------|
| O11 | Dy3 | O13 | 97.62(17)  | O16 | Dy4 | N31 | 126.75(18) |
| O11 | Dy3 | O16 | 138.63(16) | O16 | Dy4 | N36 | 64.00(17)  |
| O11 | Dy3 | O20 | 71.65(17)  | O16 | Dy4 | N30 | 127.53(18) |
| O13 | Dy3 | Dy4 | 41.00(11)  | N19 | Dy4 | Dy3 | 128.45(15) |
| O13 | Dy3 | O16 | 64.22(16)  | N19 | Dy4 | N24 | 60.91(19)  |
| O13 | Dy3 | O20 | 147.91(13) | N19 | Dy4 | N36 | 72.0(3)    |
| O14 | Dy3 | Dy4 | 112.91(13) | N19 | Dy4 | N30 | 138.6(2)   |
| O14 | Dy3 | O9  | 153.92(17) | N24 | Dy4 | Dy3 | 89.85(12)  |
| O14 | Dy3 | O10 | 130.29(17) | N25 | Dy4 | Dy3 | 122.76(15) |
| O14 | Dy3 | O11 | 91.82(18)  | N25 | Dy4 | N19 | 87.4(2)    |
| O14 | Dy3 | O13 | 72.17(17)  | N25 | Dy4 | N24 | 69.00(19)  |
| O14 | Dy3 | O16 | 114.43(17) | N25 | Dy4 | N36 | 138.6(2)   |
| O14 | Dy3 | O17 | 83.34(18)  | N25 | Dy4 | N30 | 61.5(2)    |
| O14 | Dy3 | O20 | 77.91(18)  | N31 | Dy4 | Dy3 | 143.57(15) |
| O16 | Dy3 | Dy4 | 40.92(11)  | N31 | Dy4 | N19 | 77.4(2)    |
| O17 | Dy3 | Dy4 | 113.56(12) | N31 | Dy4 | N24 | 126.57(19) |
| O17 | Dy3 | O9  | 80.22(16)  | N31 | Dy4 | N25 | 77.7(2)    |
| O17 | Dy3 | O10 | 138.15(17) | N31 | Dy4 | N36 | 63.14(19)  |
| O17 | Dy3 | O11 | 144.78(17) | N31 | Dy4 | N30 | 70.2(2)    |
| O17 | Dy3 | O13 | 113.71(16) | N36 | Dy4 | Dy3 | 97.69(13)  |
| O17 | Dy3 | O16 | 73.05(16)  | N36 | Dy4 | N24 | 124.24(18) |
| O17 | Dy3 | O20 | 73.22(17)  | N36 | Dy4 | N30 | 112.8(2)   |
| O20 | Dy3 | Dy4 | 167.29(12) | N30 | Dy4 | Dy3 | 92.54(14)  |
| O20 | Dy3 | O16 | 142.15(16) | N30 | Dy4 | N24 | 121.95(19) |

---



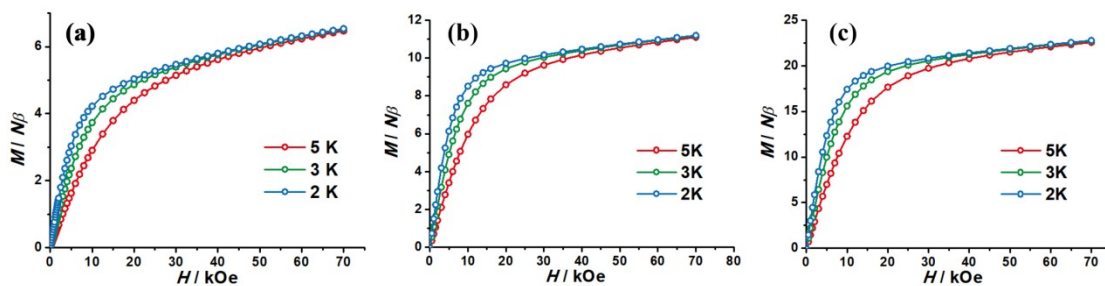

Fig. S7 The isothermal  $M$  vs.  $H$  plots for **1-3**, respectively.

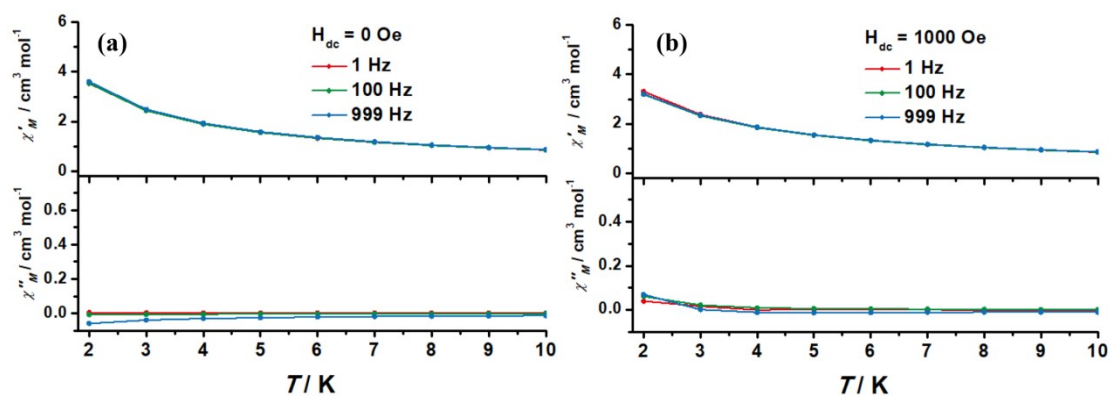

Fig. S8 Temperature dependence of the in-phase  $\chi'_M$  and out-of-phase  $\chi''_M$  for **1** in a zero dc field(a); and in a 1000 Oe dc field(b).

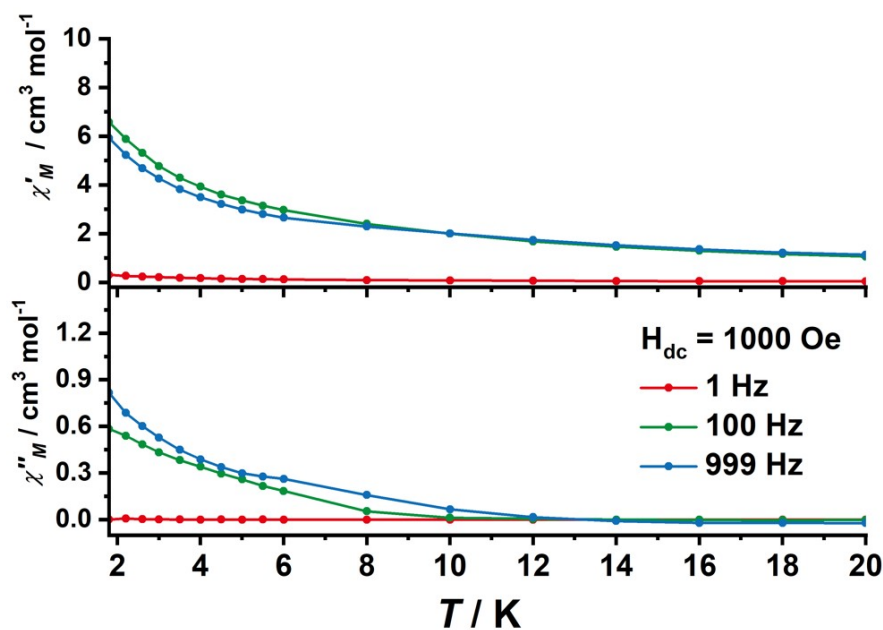

Fig. S9 Temperature dependence of the in-phase  $\chi'_M$  product and out-of-phase  $\chi''_M$  for **2** in a 1000 Oe dc field.

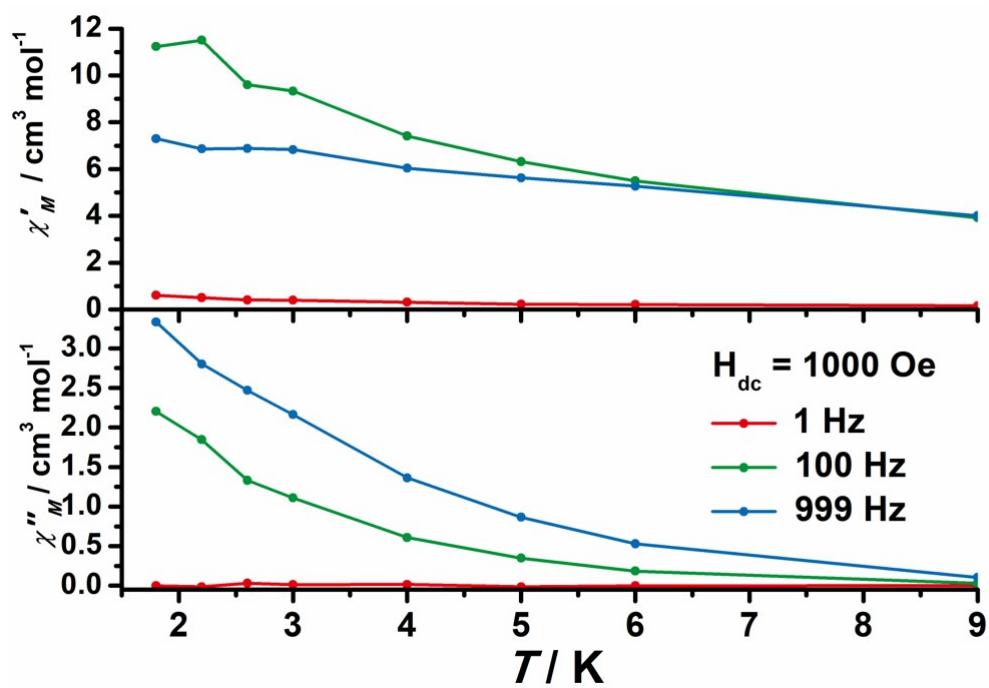

Fig. S10 Temperature dependence of the in-phase  $\chi_M'$  product and out-of-phase  $\chi_M''$  for 3 in a 1000 Oe dc field.

Table S13 The average energy barriers( $\Delta E/k_B$ ) and pre-exponential factors( $\tau_0$ ) of complex 2

|         | $\Delta E/k_B$ | $\tau_0$               |
|---------|----------------|------------------------|
| 100 Hz  | 0.81 K         | $5.5 \times 10^{-5}$ s |
| 1000 Hz | 0.87 K         | $1.6 \times 10^{-5}$ s |
| average | 0.84 K         | $3.6 \times 10^{-5}$ s |

Table S14 The average energy barriers( $\Delta E/k_B$ ) and pre-exponential factors( $\tau_0$ ) of complex 3

|         | $\Delta E/k_B$ | $\tau_0$               |
|---------|----------------|------------------------|
| 52 Hz   | 4.06 K         | $1.1 \times 10^{-4}$ s |
| 139 Hz  | 4.83 K         | $1.8 \times 10^{-5}$ s |
| 373 Hz  | 5.48 K         | $2.5 \times 10^{-6}$ s |
| 999 Hz  | 5.73 K         | $3.7 \times 10^{-7}$ s |
| average | 5.03 K         | $3.3 \times 10^{-5}$ s |
